# Supplementary material for: Comprehensive Approach to Distinguish Patients with Solid Tumors from Healthy Controls by Combining Androgen Receptor Mutation p.H875Y with Cell-Free DNA Methylation and Circulating miRNAs
Source: MDPI journal article supplement (doi:10.3390/cancers14020462), 2022-01-17
Supplement: s1 [file s1]

**Comprehensive approach to distinguish patients with solid tumors from healthy controls by combining androgen receptor mutation p.H875Y with cell-free DNA methylation and circulating miRNAs** Elena Tomeva, Olivier J. Switzeny, Clemens Heitzinger, Berit Hippe, and Alexander G. Haslberger

This file contains supplementary materials for the manuscript Comprehensive approach to distinguish patients with solid tumors from healthy controls by combining androgen receptor mutation p.H875Y with cell-free DNA methylation and circulating miRNAs by Tomeva E., Switzeny OJ., Heitzinger C., Hippe B., and Haslberger AG (2021)

**List of tables**

|                                                                                                      |   |
|------------------------------------------------------------------------------------------------------|---|
| <b>Supplementary Table S1.</b> Assays for the mutation analysis of cell-free DNA. ....               | 1 |
| <b>Supplementary Table S2.</b> Primer sequences used for methylation analysis of cell-free DNA. .... | 4 |
| <b>Supplementary Table S3.</b> Assays used for miRNA analysis.....                                   | 5 |
| <b>Supplementary Table S4.</b> Mutation frequencies in all samples.....                              | 7 |

**List of figures**

|                                                                               |    |
|-------------------------------------------------------------------------------|----|
| <b>Supplementary Figure S1.</b> Correlation matrix of all variables. ....     | 10 |
| <b>Supplementary Figure S2.</b> Correlation plots for each cancer type. ....  | 11 |
| <b>Supplementary Figure S3.</b> Heatmap of the cell-free DNA methylation..... | 12 |
| <b>Supplementary Figure S4.</b> Heatmap of the miRNAs levels. ....            | 13 |

**Supplementary Table S1.** Assays for the mutation analysis of cell-free DNA.

$\Delta Ct$  values for each sample were calculated as followed:  $\Delta Ct = Ct(\text{Mu Assay}) - Ct(\text{Rf Assay})$ . If a  $\Delta Ct$  value for a sample was beneath the cut-off  $\Delta Ct$  value a presence of a mutation was concluded. Ct threshold cycle, mu mutation, rf reference, AA amino acid

| Gene name | Cosmic ID  | Target Information | AA mutation type        | Cut-off $\Delta Ct$ value for the presence of a mutation | TaqMan™ Mutation Detection Assays ID |
|-----------|------------|--------------------|-------------------------|----------------------------------------------------------|--------------------------------------|
| AKT1      | COSM33765  | mu                 | Substitution - Missense | <8.0                                                     | Hs00000986_mu                        |
|           | -          | rf                 |                         |                                                          | Hs00001010_rf                        |
| APC       | COSM13127  | mu                 | Substitution - Nonsense | <6.5                                                     | Hs00000945_mu                        |
|           | COSM18561  | mu                 | Insertion - Frameshift  | <5.0                                                     | Hs00000958_mu                        |
|           | -          | rf                 |                         |                                                          | Hs00001012_rf                        |
| AR        | COSM236693 | mu                 | Substitution - Missense | <9.0                                                     | custom assay                         |
|           | COSM238553 | mu                 | Substitution - Missense | <9.0                                                     | custom assay                         |
|           | COSM238555 | mu                 | Substitution - Missense | <9.0                                                     | custom assay                         |
|           | -          | rf                 |                         |                                                          | custom assay                         |

|               |             |    |                         |      |               |
|---------------|-------------|----|-------------------------|------|---------------|
| <b>BRAF</b>   | COSM476     | mu | Substitution - Missense | <7.0 | custom assay  |
|               | -           | rf |                         |      | Hs00000172_rf |
| <b>CTNNB1</b> | COSM5661    | mu | Substitution - Missense | <9.0 | Hs00000863_mu |
|               | COSM5662    | mu | Substitution - Missense | <9.0 | Hs00000864_mu |
|               | COSM5663    | mu | Substitution - Missense | <9.0 | Hs00000865_mu |
|               | COSM5664    | mu | Substitution - Missense | <9.0 | Hs00000866_mu |
|               | COSM5677    | mu | Substitution - Missense | <9.0 | Hs00000875_mu |
|               | -           | rf |                         |      | Hs00001014_rf |
| <b>EGFR</b>   | COSM6224    | mu | Substitution - Missense | <9.0 | Hs00000102_mu |
|               | COSM6240    | mu | Substitution - Missense | <9.0 | Hs00000106_mu |
|               | -           | rf |                         |      | Hs00000173_rf |
| <b>ERBB2</b>  | COSM12558   | mu | Insertion - In frame    | <8.5 | Hs00001463_mu |
|               | COSM14060   | mu | Substitution - Missense | <7.7 | Hs00001565_mu |
|               | COSM14062   | mu | Substitution - Missense | <6.8 | Hs00001142_mu |
|               | COSM48358   | mu | Substitution - Missense | <9.0 | custom assay  |
|               | -           | rf |                         |      | Hs00001366_rf |
| <b>ESR1</b>   | COSM4745827 | mu | Substitution - Missense | <9.0 | custom assay  |
|               | -           | rf |                         |      | custom assay  |
| <b>FBXW7</b>  | COSM22932   | mu | Substitution - Missense | <4.2 | Hs00001410_mu |
|               | COSM22965   | mu | Substitution - Missense | <4.2 | Hs00001070_mu |
|               | -           | rf |                         |      | Hs00001368_rf |
| <b>FGFR3</b>  | COSM715     | mu | Substitution - Missense | <5.2 | Hs00000812_mu |
|               | COSM718     | mu | Substitution - Missense | <8.5 | Hs00000814_mu |
|               | -           | rf |                         |      | Hs00001015_rf |
| <b>GNAS</b>   | COSM27887   | mu | Substitution - Missense | <9.0 | Hs00000976_mu |
|               | -           | rf |                         |      | Hs00001017_rf |
| <b>HRAS</b>   | COSM499     | mu | Substitution - Missense | <8.4 | Hs00000787_mu |
|               | -           | rf |                         |      | Hs00001018_rf |
| <b>IDH1</b>   | COSM28746   | mu | Substitution - Missense | <8.0 | Hs00000981_mu |
|               | COSM28747   | mu | Substitution - Missense | <8.2 | Hs00000982_mu |
|               | -           | rf |                         |      | Hs00001019_rf |
| <b>KRAS</b>   | COSM516     | mu | Substitution - Missense | <9.0 | Hs00000113_mu |
|               | COSM517     | mu | Substitution - Missense | <8.0 | Hs00000115_mu |
|               | COSM518     | mu | Substitution - Missense | <8.0 | Hs00000117_mu |

|               |             |    |                         |      |               |
|---------------|-------------|----|-------------------------|------|---------------|
|               | COSM520     | mu | Substitution - Missense | <5.6 | Hs00000119_mu |
|               | COSM521     | mu | Substitution - Missense | <4.0 | Hs00000121_mu |
|               | COSM522     | mu | Substitution - Missense | <5.7 | Hs00000123_mu |
|               | COSM532     | mu | Substitution - Missense | <5.8 | Hs00000131_mu |
|               | -           | rf |                         |      | Hs00000174_rf |
| <i>MED12</i>  | COSM131596  | mu | Substitution - Missense | <7.0 | custom assay  |
|               | -           | rf |                         |      | custom assay  |
| <i>NRAS</i>   | COSM580     | mu | Substitution - Missense | <8.0 | Hs00000804_mu |
|               | COSM584     | mu | Substitution - Missense | <8.0 | Hs00000808_mu |
|               | -           | rf |                         |      | Hs00001023_rf |
| <i>PIK3CA</i> | COSM760     | mu | Substitution - Missense | <4.0 | Hs00000822_mu |
|               | COSM763     | mu | Substitution - Missense | <5.5 | Hs00000824_mu |
|               | COSM775     | mu | Substitution - Missense | <8.3 | Hs00000831_mu |
|               | COSM776     | mu | Substitution - Missense | <8.0 | Hs00000832_mu |
|               | -           | rf |                         |      | Hs00001025_rf |
| <i>SMAD4</i>  | COSM14122   | mu | Substitution - Missense | <6.0 | Hs00001433_mu |
|               | -           | rf |                         |      | Hs00001380_rf |
| <i>TERT</i>   | COSM1716558 | mu | Intron variant          | <8.0 | custom assay  |
|               | COSM1716559 | mu | Intron variant          | <8.0 | custom assay  |
|               | -           | rf |                         |      | custom assay  |
| <i>TP53</i>   | COSM10645   | mu | Substitution - Missense | <9.0 | Hs00000887_mu |
|               | COSM10648   | mu | Substitution - Missense | <8.8 | Hs00000888_mu |
|               | COSM10654   | mu | Substitution - Nonsense | <8.2 | Hs00001003_mu |
|               | COSM10656   | mu | Substitution - Missense | <5.9 | Hs00000889_mu |
|               | COSM10659   | mu | Substitution - Missense | <7.6 | Hs00000890_mu |
|               | COSM10660   | mu | Substitution - Missense | <6.6 | Hs00001004_mu |
|               | COSM10662   | mu | Substitution - Missense | <8.0 | Hs00001005_mu |
|               | COSM10663   | mu | Substitution - Nonsense | <7.0 | Hs00000891_mu |
|               | COSM10670   | mu | Substitution - Missense | <8.3 | Hs00000893_mu |
|               | COSM10690   | mu | Substitution - Missense | <7.1 | Hs00000894_mu |
|               | COSM10704   | mu | Substitution - Missense | <8.0 | Hs00000895_mu |
|               | COSM10705   | mu | Substitution - Nonsense | <7.8 | Hs00000896_mu |
|               | COSM10722   | mu | Substitution - Missense | <6.6 | Hs00000901_mu |

|            |           |    |                         |      |               |
|------------|-----------|----|-------------------------|------|---------------|
|            | COSM10733 | mu | Substitution - Nonsense | <8.6 | Hs00000903_mu |
|            | COSM10742 | mu | Substitution - Missense | <7.4 | Hs00000905_mu |
|            | COSM10758 | mu | Substitution - Missense | <8.3 | Hs00000906_mu |
|            | COSM10790 | mu | Substitution - Missense | <7.0 | Hs00000909_mu |
|            | COSM10808 | mu | Substitution - Missense | <9.0 | Hs00000910_mu |
|            | COSM10817 | mu | Substitution - Missense | <8.1 | Hs00000914_mu |
|            | COSM10863 | mu | Substitution - Missense | <7.0 | Hs00000915_mu |
|            | COSM10889 | mu | Substitution - Missense | <3.0 | Hs00001006_mu |
|            | COSM10891 | mu | Substitution - Missense | <8.0 | Hs00000917_mu |
|            | COSM11073 | mu | Substitution - Nonsense | <8.0 | Hs00000921_mu |
|            | COSM6549  | mu | Substitution - Missense | <9.0 | Hs00000885_mu |
|            | COSM6932  | mu | Substitution - Missense | <6.6 | Hs00000886_mu |
|            | -         | rf |                         |      | Hs00001027_rf |
| <b>VHL</b> | COSM14305 | mu | Substitution - Missense | <5.1 | Hs00001107_mu |
|            | COSM14372 | mu | Substitution - Nonsense | <7.8 | Hs00000949_mu |
|            | COSM17612 | mu | Substitution - Nonsense | <7.5 | Hs00001113_mu |
|            | -         | rf |                         |      | Hs00001028_rf |

**Supplementary Table S2.** Primer sequences used for methylation analysis of cell-free DNA.  
fwd forward primer, rev reverse primer, bp base pairs

| Gene         | Primer | Sequence '5->3'      | Amplicon length bp |
|--------------|--------|----------------------|--------------------|
| <b>SEPT9</b> | Fwd    | CTGCCCACCAGCCATCAT   | 62                 |
|              | Rev    | CCGAAATGATCCCATCCAGC |                    |
| <b>MLH1</b>  | Fwd    | TATTCGTGCTCAGCCTCGTA | 119                |
|              | Rev    | CGTTATTTGGTGGTGGAGCC |                    |
| <b>MGMT</b>  | Fwd    | CGCCCCTAGAACGCTTTG   | 74                 |
|              | Rev    | GACACTACCAAGTCGCAA   |                    |
| <b>GATA5</b> | Fwd    | AGAAGGGGCGGGCG       | 100                |
|              | Rev    | AAGACTGGAAGCCCGG     |                    |
| <b>GSTP1</b> | Fwd    | CTCCGGGGACTCCAGGG    | 100                |
|              | Rev    | CGCTCTTCTGGAGGGTCC   |                    |
| <b>SFN</b>   | Fwd    | CCGAACGCTATGAGGACATG | 114                |
|              | Rev    | CGCCACCACGTTCTTATAG  |                    |
| <b>MDR1</b>  | Fwd    | GGTGGGAGGAAGCATCGT   | 100                |
|              | Rev    | GGCAGAGTTGGGGTCT     |                    |
| <b>VIM</b>   | Fwd    | GCTTCTCGCTAGGTCCTAT  | 100                |
|              | Rev    | CCGAGGGCGCTGTTTTATA  |                    |

|                |     |                      |     |
|----------------|-----|----------------------|-----|
| <i>SHOX2</i>   | Fwd | TTAAACATCCGAGCTGCTGG | 115 |
|                | Rev | CGACCCTAAACGCTTAACCC |     |
| <i>ALKBH3</i>  | Fwd | CTACCCGGACTGAGGACTG  | 100 |
|                | Rev | CTCCAGCAACTCCCAATCAC |     |
| <i>APC</i>     | Fwd | CTAGGGCTAGGCAGGCTG   | 100 |
|                | Rev | ATCCAGCGGATTACACAGCT |     |
| <i>RASSF1A</i> | Fwd | GAGCTGGCACCCGCT      | 100 |
|                | Rev | GCCGTGTGGGGTTGC      |     |

**Supplementary Table S3.** Assays used for miRNA analysis.

| <b>TaqMan™ Advanced<br/>miRNA Assay ID</b> | <b>miRNA</b>    |
|--------------------------------------------|-----------------|
| 478575_mir                                 | hsa-let-7a-5p   |
| 477863_mir                                 | hsa-miR-101-3p  |
| 478225_mir                                 | hsa-miR-106a-5p |
| 477887_mir                                 | hsa-miR-126-3p  |
| 478511_mir                                 | hsa-miR-133a-3p |
| 478501_mir                                 | hsa-miR-141-3p  |
| 477911_mir                                 | hsa-miR-142-5p  |
| 477912_mir                                 | hsa-miR-143-3p  |
| 477916_mir                                 | hsa-miR-145-5p  |
| 477814_mir                                 | hsa-miR-148a-3p |
| 477824_mir                                 | hsa-miR-148b-3p |
| 477927_mir                                 | hsa-miR-155-5p  |
| 478447_mir                                 | hsa-miR-17-5p   |
| 477935_mir                                 | hsa-miR-182-5p  |
| 477940_mir                                 | hsa-miR-186-5p  |
| 477957_mir                                 | hsa-miR-195-5p  |
| 477967_mir                                 | hsa-miR-205-5p  |
| 478586_mir                                 | hsa-miR-20a-5p  |
| 478293_mir                                 | cel-miR-39-3p   |
| 477975_mir                                 | hsa-miR-21-5p   |
| 477970_mir                                 | hsa-miR-210-3p  |
| 477985_mir                                 | hsa-miR-22-3p   |
| 477987_mir                                 | hsa-miR-22-5p   |
| 477981_mir                                 | hsa-miR-221-3p  |
| 477982_mir                                 | hsa-miR-222-3p  |
| 477983_mir                                 | hsa-miR-223-3p  |
| 477986_mir                                 | hsa-miR-224-5p  |
| 478532_mir                                 | hsa-miR-23a-3p  |
| 477994_mir                                 | hsa-miR-25-3p   |
| 477995_mir                                 | hsa-miR-26a-5p  |
| 478384_mir                                 | hsa-miR-27a-3p  |
| 479229_mir                                 | hsa-miR-29c-3p  |

|            |                 |
|------------|-----------------|
| 479448_mir | hsa-miR-30a-5p  |
| 478015_mir | hsa-miR-31-5p   |
| 478048_mir | hsa-miR-34a-5p  |
| 478074_mir | hsa-miR-375-3p  |
| 478107_mir | hsa-miR-451a    |
| 478138_mir | hsa-miR-497-5p  |
| 477827_mir | hsa-miR-92a-3p  |
| 477879_mir | hsa-miR-124-3p  |
| 477977_mir | hsa-miR-218-5p  |
| 477937_mir | hsa-miR-183-5p  |
| 478316_mir | hsa-miR-203a-3p |
| 477875_mir | hsa-miR-1225-3p |
| 478215_mir | hsa-miR-96-5p   |
| 478214_mir | hsa-miR-9-5p    |
| 477860_mir | hsa-miR-16-5p   |
| 478418_mir | hsa-miR-26b-5p  |

**Supplementary Table S4.** Mutation frequencies in all samples.  
The frequencies of the detected mutations are depicted as an absolute value and percentage of the respective study group (in round brackets).

|        |             | Healthy    | Bladder     | Brain      | Breast      | CRC         | Lung        | Ovarian    | Prostate    | Stomach     | Pancreas   | All          |
|--------|-------------|------------|-------------|------------|-------------|-------------|-------------|------------|-------------|-------------|------------|--------------|
|        | N           | 15         | 20          | 9          | 30          | 28          | 29          | 19         | 27          | 23          | 12         | 212          |
|        | Females     | 8          | 3           | 3          | 29          | 14          | 4           | 19         | 0           | 15          | 6          | 101          |
|        | Male        | 7          | 17          | 6          | 1           | 14          | 25          | 0          | 27          | 8           | 6          | 111          |
| AKT1   | COSM33765   | 0 ( 0 % )  | 0 ( 0 % )   | 0 ( 0 % )  | 2 ( 7 % )   | 1 ( 4 % )   | 1 ( 3 % )   | 0 ( 0 % )  | 1 ( 4 % )   | 0 ( 0 % )   | 0 ( 0 % )  | 5 ( 2 % )    |
| APC    | COSM13127   | 0 ( 0 % )  | 0 ( 0 % )   | 0 ( 0 % )  | 4 ( 13 % )  | 3 ( 11 % )  | 2 ( 7 % )   | 1 ( 5 % )  | 2 ( 7 % )   | 1 ( 4 % )   | 3 ( 25 % ) | 16 ( 8 % )   |
| APC    | COSM18561   | 0 ( 0 % )  | 4 ( 20 % )  | 2 ( 22 % ) | 7 ( 23 % )  | 5 ( 18 % )  | 6 ( 21 % )  | 5 ( 26 % ) | 5 ( 19 % )  | 7 ( 30 % )  | 4 ( 33 % ) | 45 ( 21 % )  |
| AR     | COSM238555  | 0 ( 0 % )  | 16 ( 80 % ) | 1 ( 11 % ) | 18 ( 60 % ) | 24 ( 86 % ) | 14 ( 48 % ) | 3 ( 16 % ) | 18 ( 67 % ) | 6 ( 26 % )  | 1 ( 8 % )  | 101 ( 48 % ) |
| AR     | COSM236693  | 0 ( 0 % )  | 3 ( 15 % )  | 1 ( 11 % ) | 6 ( 20 % )  | 4 ( 14 % )  | 2 ( 7 % )   | 2 ( 11 % ) | 6 ( 22 % )  | 2 ( 9 % )   | 0 ( 0 % )  | 26 ( 12 % )  |
| AR     | COSM238553  | 0 ( 0 % )  | 0 ( 0 % )   | 0 ( 0 % )  | 2 ( 7 % )   | 1 ( 4 % )   | 2 ( 7 % )   | 0 ( 0 % )  | 1 ( 4 % )   | 0 ( 0 % )   | 0 ( 0 % )  | 6 ( 3 % )    |
| BRAF   | COSM476     | 0 ( 0 % )  | 3 ( 15 % )  | 2 ( 22 % ) | 3 ( 10 % )  | 4 ( 14 % )  | 4 ( 14 % )  | 2 ( 11 % ) | 1 ( 4 % )   | 0 ( 0 % )   | 2 ( 17 % ) | 21 ( 10 % )  |
| CTNNB1 | COSM5663    | 2 ( 13 % ) | 4 ( 20 % )  | 1 ( 11 % ) | 2 ( 7 % )   | 4 ( 14 % )  | 1 ( 3 % )   | 0 ( 0 % )  | 0 ( 0 % )   | 1 ( 4 % )   | 0 ( 0 % )  | 15 ( 7 % )   |
| CTNNB1 | COSM5664    | 0 ( 0 % )  | 2 ( 10 % )  | 0 ( 0 % )  | 1 ( 3 % )   | 0 ( 0 % )   | 0 ( 0 % )   | 0 ( 0 % )  | 1 ( 4 % )   | 0 ( 0 % )   | 0 ( 0 % )  | 4 ( 2 % )    |
| CTNNB1 | COSM5662    | 0 ( 0 % )  | 0 ( 0 % )   | 0 ( 0 % )  | 0 ( 0 % )   | 0 ( 0 % )   | 0 ( 0 % )   | 2 ( 11 % ) | 1 ( 4 % )   | 3 ( 13 % )  | 1 ( 8 % )  | 7 ( 3 % )    |
| CTNNB1 | COSM5661    | 0 ( 0 % )  | 3 ( 15 % )  | 2 ( 22 % ) | 2 ( 7 % )   | 3 ( 11 % )  | 0 ( 0 % )   | 0 ( 0 % )  | 0 ( 0 % )   | 1 ( 4 % )   | 0 ( 0 % )  | 11 ( 5 % )   |
| CTNNB1 | COSM5677    | 0 ( 0 % )  | 0 ( 0 % )   | 0 ( 0 % )  | 0 ( 0 % )   | 0 ( 0 % )   | 0 ( 0 % )   | 0 ( 0 % )  | 0 ( 0 % )   | 0 ( 0 % )   | 0 ( 0 % )  | 0 ( 0 % )    |
| EGFR   | COSM6224    | 8 ( 53 % ) | 9 ( 45 % )  | 1 ( 11 % ) | 8 ( 27 % )  | 17 ( 61 % ) | 13 ( 45 % ) | 9 ( 47 % ) | 12 ( 44 % ) | 11 ( 48 % ) | 9 ( 75 % ) | 97 ( 46 % )  |
| EGFR   | COSM6223    | 0 ( 0 % )  | 0 ( 0 % )   | 0 ( 0 % )  | 0 ( 0 % )   | 0 ( 0 % )   | 0 ( 0 % )   | 0 ( 0 % )  | 0 ( 0 % )   | 0 ( 0 % )   | 0 ( 0 % )  | 0 ( 0 % )    |
| EGFR   | COSM6240    | 0 ( 0 % )  | 1 ( 5 % )   | 0 ( 0 % )  | 1 ( 3 % )   | 1 ( 4 % )   | 1 ( 3 % )   | 0 ( 0 % )  | 2 ( 7 % )   | 1 ( 4 % )   | 0 ( 0 % )  | 7 ( 3 % )    |
| ERBB2  | COSM48358   | 0 ( 0 % )  | 0 ( 0 % )   | 1 ( 11 % ) | 0 ( 0 % )   | 0 ( 0 % )   | 1 ( 3 % )   | 0 ( 0 % )  | 0 ( 0 % )   | 1 ( 4 % )   | 0 ( 0 % )  | 3 ( 1 % )    |
| ERBB2  | COSM14060   | 0 ( 0 % )  | 1 ( 5 % )   | 1 ( 11 % ) | 1 ( 3 % )   | 1 ( 4 % )   | 2 ( 7 % )   | 1 ( 5 % )  | 2 ( 7 % )   | 2 ( 9 % )   | 0 ( 0 % )  | 11 ( 5 % )   |
| ERBB2  | COSM12558   | 0 ( 0 % )  | 0 ( 0 % )   | 0 ( 0 % )  | 1 ( 3 % )   | 0 ( 0 % )   | 0 ( 0 % )   | 0 ( 0 % )  | 0 ( 0 % )   | 1 ( 4 % )   | 0 ( 0 % )  | 2 ( 1 % )    |
| ERBB2  | COSM14062   | 0 ( 0 % )  | 3 ( 15 % )  | 2 ( 22 % ) | 2 ( 7 % )   | 7 ( 25 % )  | 4 ( 14 % )  | 1 ( 5 % )  | 1 ( 4 % )   | 2 ( 9 % )   | 0 ( 0 % )  | 22 ( 10 % )  |
| ESR1   | COSM4745827 | 0 ( 0 % )  | 0 ( 0 % )   | 0 ( 0 % )  | 1 ( 3 % )   | 2 ( 7 % )   | 4 ( 14 % )  | 0 ( 0 % )  | 1 ( 4 % )   | 0 ( 0 % )   | 0 ( 0 % )  | 8 ( 4 % )    |
| FBXW7  | COSM22965   | 0 ( 0 % )  | 1 ( 5 % )   | 1 ( 11 % ) | 1 ( 3 % )   | 0 ( 0 % )   | 0 ( 0 % )   | 0 ( 0 % )  | 0 ( 0 % )   | 0 ( 0 % )   | 0 ( 0 % )  | 3 ( 1 % )    |
| FBXW7  | COSM22932   | 0 ( 0 % )  | 0 ( 0 % )   | 0 ( 0 % )  | 0 ( 0 % )   | 0 ( 0 % )   | 0 ( 0 % )   | 0 ( 0 % )  | 0 ( 0 % )   | 0 ( 0 % )   | 0 ( 0 % )  | 0 ( 0 % )    |
| FGFR3  | COSM715     | 0 ( 0 % )  | 0 ( 0 % )   | 0 ( 0 % )  | 1 ( 3 % )   | 0 ( 0 % )   | 1 ( 3 % )   | 0 ( 0 % )  | 0 ( 0 % )   | 0 ( 0 % )   | 0 ( 0 % )  | 2 ( 1 % )    |
| FGFR3  | COSM718     | 3 ( 20 % ) | 4 ( 20 % )  | 3 ( 33 % ) | 8 ( 27 % )  | 10 ( 36 % ) | 8 ( 28 % )  | 8 ( 42 % ) | 10 ( 37 % ) | 9 ( 39 % )  | 1 ( 8 % )  | 64 ( 30 % )  |
| GNAS   | COSM27887   | 0 ( 0 % )  | 0 ( 0 % )   | 0 ( 0 % )  | 2 ( 7 % )   | 1 ( 4 % )   | 1 ( 3 % )   | 0 ( 0 % )  | 1 ( 4 % )   | 0 ( 0 % )   | 0 ( 0 % )  | 5 ( 2 % )    |
| HRAS   | COSM483     | 0 ( 0 % )  | 0 ( 0 % )   | 0 ( 0 % )  | 0 ( 0 % )   | 0 ( 0 % )   | 0 ( 0 % )   | 0 ( 0 % )  | 0 ( 0 % )   | 0 ( 0 % )   | 0 ( 0 % )  | 0 ( 0 % )    |
| HRAS   | COSM499     | 0 ( 0 % )  | 0 ( 0 % )   | 0 ( 0 % )  | 0 ( 0 % )   | 0 ( 0 % )   | 0 ( 0 % )   | 0 ( 0 % )  | 0 ( 0 % )   | 0 ( 0 % )   | 0 ( 0 % )  | 0 ( 0 % )    |
| IDH1   | COSM28746   | 0 ( 0 % )  | 1 ( 5 % )   | 0 ( 0 % )  | 2 ( 7 % )   | 0 ( 0 % )   | 3 ( 10 % )  | 0 ( 0 % )  | 1 ( 4 % )   | 0 ( 0 % )   | 1 ( 8 % )  | 8 ( 4 % )    |
| IDH1   | COSM28747   | 0 ( 0 % )  | 1 ( 5 % )   | 0 ( 0 % )  | 2 ( 7 % )   | 0 ( 0 % )   | 3 ( 10 % )  | 0 ( 0 % )  | 1 ( 4 % )   | 0 ( 0 % )   | 0 ( 0 % )  | 7 ( 3 % )    |
| KRAS   | COSM521     | 0 ( 0 % )  | 3 ( 15 % )  | 0 ( 0 % )  | 0 ( 0 % )   | 0 ( 0 % )   | 1 ( 3 % )   | 0 ( 0 % )  | 3 ( 11 % )  | 0 ( 0 % )   | 1 ( 8 % )  | 8 ( 4 % )    |
| KRAS   | COSM520     | 0 ( 0 % )  | 0 ( 0 % )   | 1 ( 11 % ) | 0 ( 0 % )   | 0 ( 0 % )   | 0 ( 0 % )   | 0 ( 0 % )  | 0 ( 0 % )   | 0 ( 0 % )   | 0 ( 0 % )  | 1 ( 0 % )    |
| KRAS   | COSM516     | 0 ( 0 % )  | 1 ( 5 % )   | 0 ( 0 % )  | 0 ( 0 % )   | 1 ( 4 % )   | 0 ( 0 % )   | 1 ( 5 % )  | 1 ( 4 % )   | 0 ( 0 % )   | 0 ( 0 % )  | 4 ( 2 % )    |

|        |             |            |             |            |             |             |             |            |            |            |            |             |
|--------|-------------|------------|-------------|------------|-------------|-------------|-------------|------------|------------|------------|------------|-------------|
| KRAS   | COSM532     | 0 ( 0 % )  | 1 ( 5 % )   | 1 ( 11 % ) | 2 ( 7 % )   | 2 ( 7 % )   | 2 ( 7 % )   | 1 ( 5 % )  | 3 ( 11 % ) | 1 ( 4 % )  | 2 ( 17 % ) | 15 ( 7 % )  |
| KRAS   | COSM522     | 0 ( 0 % )  | 0 ( 0 % )   | 0 ( 0 % )  | 1 ( 3 % )   | 0 ( 0 % )   | 0 ( 0 % )   | 1 ( 5 % )  | 1 ( 4 % )  | 0 ( 0 % )  | 0 ( 0 % )  | 3 ( 1 % )   |
| KRAS   | COSM518     | 0 ( 0 % )  | 0 ( 0 % )   | 0 ( 0 % )  | 0 ( 0 % )   | 0 ( 0 % )   | 0 ( 0 % )   | 0 ( 0 % )  | 0 ( 0 % )  | 0 ( 0 % )  | 0 ( 0 % )  | 0 ( 0 % )   |
| KRAS   | COSM517     | 2 ( 13 % ) | 1 ( 5 % )   | 1 ( 11 % ) | 1 ( 3 % )   | 0 ( 0 % )   | 1 ( 3 % )   | 0 ( 0 % )  | 1 ( 4 % )  | 0 ( 0 % )  | 0 ( 0 % )  | 7 ( 3 % )   |
| MED12  | COSM131596  | 0 ( 0 % )  | 3 ( 15 % )  | 0 ( 0 % )  | 3 ( 10 % )  | 3 ( 11 % )  | 4 ( 14 % )  | 1 ( 5 % )  | 6 ( 22 % ) | 0 ( 0 % )  | 0 ( 0 % )  | 20 ( 9 % )  |
| NRAS   | COSM584     | 0 ( 0 % )  | 2 ( 10 % )  | 1 ( 11 % ) | 1 ( 3 % )   | 2 ( 7 % )   | 5 ( 17 % )  | 1 ( 5 % )  | 1 ( 4 % )  | 4 ( 17 % ) | 1 ( 8 % )  | 18 ( 8 % )  |
| NRAS   | NRAS_580    | 0 ( 0 % )  | 1 ( 5 % )   | 0 ( 0 % )  | 0 ( 0 % )   | 2 ( 7 % )   | 0 ( 0 % )   | 0 ( 0 % )  | 0 ( 0 % )  | 0 ( 0 % )  | 0 ( 0 % )  | 3 ( 1 % )   |
| PIK3CA | COSM763     | 0 ( 0 % )  | 6 ( 30 % )  | 0 ( 0 % )  | 4 ( 13 % )  | 5 ( 18 % )  | 4 ( 14 % )  | 4 ( 21 % ) | 5 ( 19 % ) | 2 ( 9 % )  | 3 ( 25 % ) | 33 ( 16 % ) |
| PIK3CA | COSM775     | 0 ( 0 % )  | 1 ( 5 % )   | 2 ( 22 % ) | 4 ( 13 % )  | 2 ( 7 % )   | 4 ( 14 % )  | 1 ( 5 % )  | 5 ( 19 % ) | 3 ( 13 % ) | 0 ( 0 % )  | 22 ( 10 % ) |
| PIK3CA | COSM776     | 0 ( 0 % )  | 1 ( 5 % )   | 0 ( 0 % )  | 0 ( 0 % )   | 0 ( 0 % )   | 1 ( 3 % )   | 2 ( 11 % ) | 2 ( 7 % )  | 0 ( 0 % )  | 1 ( 8 % )  | 7 ( 3 % )   |
| PIK3CA | COSM760     | 1 ( 7 % )  | 5 ( 25 % )  | 1 ( 11 % ) | 2 ( 7 % )   | 1 ( 4 % )   | 1 ( 3 % )   | 1 ( 5 % )  | 0 ( 0 % )  | 3 ( 13 % ) | 1 ( 8 % )  | 16 ( 8 % )  |
| SMAD4  | COSM14122   | 0 ( 0 % )  | 0 ( 0 % )   | 0 ( 0 % )  | 0 ( 0 % )   | 0 ( 0 % )   | 1 ( 3 % )   | 1 ( 5 % )  | 1 ( 4 % )  | 2 ( 9 % )  | 1 ( 8 % )  | 6 ( 3 % )   |
| TERT   | COSM1716558 | 0 ( 0 % )  | 1 ( 5 % )   | 0 ( 0 % )  | 2 ( 7 % )   | 5 ( 18 % )  | 1 ( 3 % )   | 1 ( 5 % )  | 0 ( 0 % )  | 0 ( 0 % )  | 0 ( 0 % )  | 10 ( 5 % )  |
| TERT   | COSM1716559 | 0 ( 0 % )  | 6 ( 30 % )  | 2 ( 22 % ) | 5 ( 17 % )  | 11 ( 39 % ) | 7 ( 24 % )  | 3 ( 16 % ) | 6 ( 22 % ) | 4 ( 17 % ) | 2 ( 17 % ) | 46 ( 22 % ) |
| TP53   | COSM10648   | 0 ( 0 % )  | 3 ( 15 % )  | 0 ( 0 % )  | 6 ( 20 % )  | 8 ( 29 % )  | 3 ( 10 % )  | 1 ( 5 % )  | 2 ( 7 % )  | 2 ( 9 % )  | 4 ( 33 % ) | 29 ( 14 % ) |
| TP53   | COSM10659   | 0 ( 0 % )  | 2 ( 10 % )  | 0 ( 0 % )  | 3 ( 10 % )  | 3 ( 11 % )  | 3 ( 10 % )  | 0 ( 0 % )  | 2 ( 7 % )  | 2 ( 9 % )  | 2 ( 17 % ) | 17 ( 8 % )  |
| TP53   | COSM10662   | 1 ( 7 % )  | 2 ( 10 % )  | 0 ( 0 % )  | 4 ( 13 % )  | 3 ( 11 % )  | 3 ( 10 % )  | 2 ( 11 % ) | 3 ( 11 % ) | 1 ( 4 % )  | 4 ( 33 % ) | 23 ( 11 % ) |
| TP53   | COSM6549    | 1 ( 7 % )  | 0 ( 0 % )   | 1 ( 11 % ) | 4 ( 13 % )  | 6 ( 21 % )  | 6 ( 21 % )  | 5 ( 26 % ) | 4 ( 15 % ) | 1 ( 4 % )  | 4 ( 33 % ) | 32 ( 15 % ) |
| TP53   | COSM10656   | 0 ( 0 % )  | 1 ( 5 % )   | 0 ( 0 % )  | 3 ( 10 % )  | 1 ( 4 % )   | 0 ( 0 % )   | 1 ( 5 % )  | 0 ( 0 % )  | 0 ( 0 % )  | 0 ( 0 % )  | 7 ( 3 % )   |
| TP53   | COSM10779   | 0 ( 0 % )  | 0 ( 0 % )   | 0 ( 0 % )  | 0 ( 0 % )   | 0 ( 0 % )   | 0 ( 0 % )   | 0 ( 0 % )  | 0 ( 0 % )  | 0 ( 0 % )  | 0 ( 0 % )  | 0 ( 0 % )   |
| TP53   | COSM10660   | 0 ( 0 % )  | 2 ( 10 % )  | 0 ( 0 % )  | 3 ( 10 % )  | 4 ( 14 % )  | 3 ( 10 % )  | 0 ( 0 % )  | 1 ( 4 % )  | 1 ( 4 % )  | 1 ( 8 % )  | 15 ( 7 % )  |
| TP53   | COSM10654   | 0 ( 0 % )  | 3 ( 15 % )  | 0 ( 0 % )  | 4 ( 13 % )  | 6 ( 21 % )  | 6 ( 21 % )  | 2 ( 11 % ) | 5 ( 19 % ) | 2 ( 9 % )  | 3 ( 25 % ) | 31 ( 15 % ) |
| TP53   | COSM10704   | 0 ( 0 % )  | 0 ( 0 % )   | 0 ( 0 % )  | 5 ( 17 % )  | 4 ( 14 % )  | 1 ( 3 % )   | 1 ( 5 % )  | 2 ( 7 % )  | 1 ( 4 % )  | 3 ( 25 % ) | 17 ( 8 % )  |
| TP53   | COSM10758   | 0 ( 0 % )  | 12 ( 60 % ) | 0 ( 0 % )  | 12 ( 40 % ) | 16 ( 57 % ) | 15 ( 52 % ) | 5 ( 26 % ) | 8 ( 30 % ) | 6 ( 26 % ) | 3 ( 25 % ) | 77 ( 36 % ) |
| TP53   | COSM6932    | 0 ( 0 % )  | 0 ( 0 % )   | 0 ( 0 % )  | 2 ( 7 % )   | 0 ( 0 % )   | 2 ( 7 % )   | 1 ( 5 % )  | 1 ( 4 % )  | 2 ( 9 % )  | 2 ( 17 % ) | 10 ( 5 % )  |
| TP53   | COSM10705   | 0 ( 0 % )  | 3 ( 15 % )  | 0 ( 0 % )  | 8 ( 27 % )  | 6 ( 21 % )  | 3 ( 10 % )  | 2 ( 11 % ) | 2 ( 7 % )  | 2 ( 9 % )  | 4 ( 33 % ) | 30 ( 14 % ) |
| TP53   | COSM11073   | 0 ( 0 % )  | 0 ( 0 % )   | 0 ( 0 % )  | 1 ( 3 % )   | 1 ( 4 % )   | 3 ( 10 % )  | 1 ( 5 % )  | 0 ( 0 % )  | 1 ( 4 % )  | 1 ( 8 % )  | 8 ( 4 % )   |
| TP53   | COSM10663   | 0 ( 0 % )  | 1 ( 5 % )   | 1 ( 11 % ) | 5 ( 17 % )  | 1 ( 4 % )   | 2 ( 7 % )   | 1 ( 5 % )  | 1 ( 4 % )  | 0 ( 0 % )  | 2 ( 17 % ) | 14 ( 7 % )  |
| TP53   | COSM10808   | 0 ( 0 % )  | 0 ( 0 % )   | 0 ( 0 % )  | 2 ( 7 % )   | 1 ( 4 % )   | 0 ( 0 % )   | 2 ( 11 % ) | 0 ( 0 % )  | 0 ( 0 % )  | 1 ( 8 % )  | 6 ( 3 % )   |
| TP53   | COSM10889   | 0 ( 0 % )  | 2 ( 10 % )  | 0 ( 0 % )  | 4 ( 13 % )  | 2 ( 7 % )   | 1 ( 3 % )   | 1 ( 5 % )  | 1 ( 4 % )  | 2 ( 9 % )  | 5 ( 42 % ) | 18 ( 8 % )  |
| TP53   | COSM10891   | 0 ( 0 % )  | 1 ( 5 % )   | 0 ( 0 % )  | 5 ( 17 % )  | 2 ( 7 % )   | 4 ( 14 % )  | 1 ( 5 % )  | 1 ( 4 % )  | 3 ( 13 % ) | 1 ( 8 % )  | 18 ( 8 % )  |
| TP53   | COSM10690   | 1 ( 7 % )  | 3 ( 15 % )  | 0 ( 0 % )  | 7 ( 23 % )  | 5 ( 18 % )  | 3 ( 10 % )  | 1 ( 5 % )  | 4 ( 15 % ) | 5 ( 22 % ) | 5 ( 42 % ) | 34 ( 16 % ) |
| TP53   | COSM10742   | 0 ( 0 % )  | 3 ( 15 % )  | 0 ( 0 % )  | 8 ( 27 % )  | 5 ( 18 % )  | 5 ( 17 % )  | 0 ( 0 % )  | 2 ( 7 % )  | 3 ( 13 % ) | 2 ( 17 % ) | 28 ( 13 % ) |
| TP53   | COSM10645   | 0 ( 0 % )  | 0 ( 0 % )   | 0 ( 0 % )  | 2 ( 7 % )   | 1 ( 4 % )   | 1 ( 3 % )   | 0 ( 0 % )  | 0 ( 0 % )  | 0 ( 0 % )  | 1 ( 8 % )  | 5 ( 2 % )   |
| TP53   | COSM10670   | 0 ( 0 % )  | 0 ( 0 % )   | 0 ( 0 % )  | 1 ( 3 % )   | 0 ( 0 % )   | 0 ( 0 % )   | 0 ( 0 % )  | 0 ( 0 % )  | 0 ( 0 % )  | 0 ( 0 % )  | 1 ( 0 % )   |
| TP53   | COSM10722   | 0 ( 0 % )  | 2 ( 10 % )  | 0 ( 0 % )  | 3 ( 10 % )  | 2 ( 7 % )   | 0 ( 0 % )   | 0 ( 0 % )  | 1 ( 4 % )  | 0 ( 0 % )  | 1 ( 8 % )  | 9 ( 4 % )   |
| TP53   | COSM10733   | 0 ( 0 % )  | 2 ( 10 % )  | 0 ( 0 % )  | 6 ( 20 % )  | 1 ( 4 % )   | 2 ( 7 % )   | 2 ( 11 % ) | 3 ( 11 % ) | 3 ( 13 % ) | 0 ( 0 % )  | 19 ( 9 % )  |
| TP53   | COSM10817   | 0 ( 0 % )  | 1 ( 5 % )   | 0 ( 0 % )  | 2 ( 7 % )   | 2 ( 7 % )   | 1 ( 3 % )   | 1 ( 5 % )  | 0 ( 0 % )  | 0 ( 0 % )  | 0 ( 0 % )  | 7 ( 3 % )   |
| TP53   | COSM10790   | 0 ( 0 % )  | 0 ( 0 % )   | 0 ( 0 % )  | 6 ( 20 % )  | 2 ( 7 % )   | 3 ( 10 % )  | 2 ( 11 % ) | 4 ( 15 % ) | 0 ( 0 % )  | 2 ( 17 % ) | 19 ( 9 % )  |



|             |           |           |            |            |            |            |            |           |           |            |           |            |
|-------------|-----------|-----------|------------|------------|------------|------------|------------|-----------|-----------|------------|-----------|------------|
| <i>TP53</i> | COSM10863 | 1 ( 7 % ) | 1 ( 5 % )  | 0 ( 0 % )  | 4 ( 13 % ) | 3 ( 11 % ) | 4 ( 14 % ) | 0 ( 0 % ) | 2 ( 7 % ) | 0 ( 0 % )  | 1 ( 8 % ) | 16 ( 8 % ) |
| <i>VHL</i>  | COSM14305 | 0 ( 0 % ) | 0 ( 0 % )  | 1 ( 11 % ) | 1 ( 3 % )  | 1 ( 4 % )  | 0 ( 0 % )  | 0 ( 0 % ) | 1 ( 4 % ) | 0 ( 0 % )  | 0 ( 0 % ) | 4 ( 2 % )  |
| <i>VHL</i>  | COSM14372 | 0 ( 0 % ) | 0 ( 0 % )  | 0 ( 0 % )  | 2 ( 7 % )  | 1 ( 4 % )  | 0 ( 0 % )  | 0 ( 0 % ) | 2 ( 7 % ) | 0 ( 0 % )  | 1 ( 8 % ) | 6 ( 3 % )  |
| <i>VHL</i>  | COSM17612 | 0 ( 0 % ) | 5 ( 25 % ) | 0 ( 0 % )  | 4 ( 13 % ) | 3 ( 11 % ) | 2 ( 7 % )  | 0 ( 0 % ) | 1 ( 4 % ) | 3 ( 13 % ) | 0 ( 0 % ) | 18 ( 8 % ) |

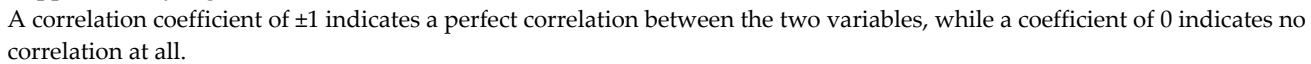



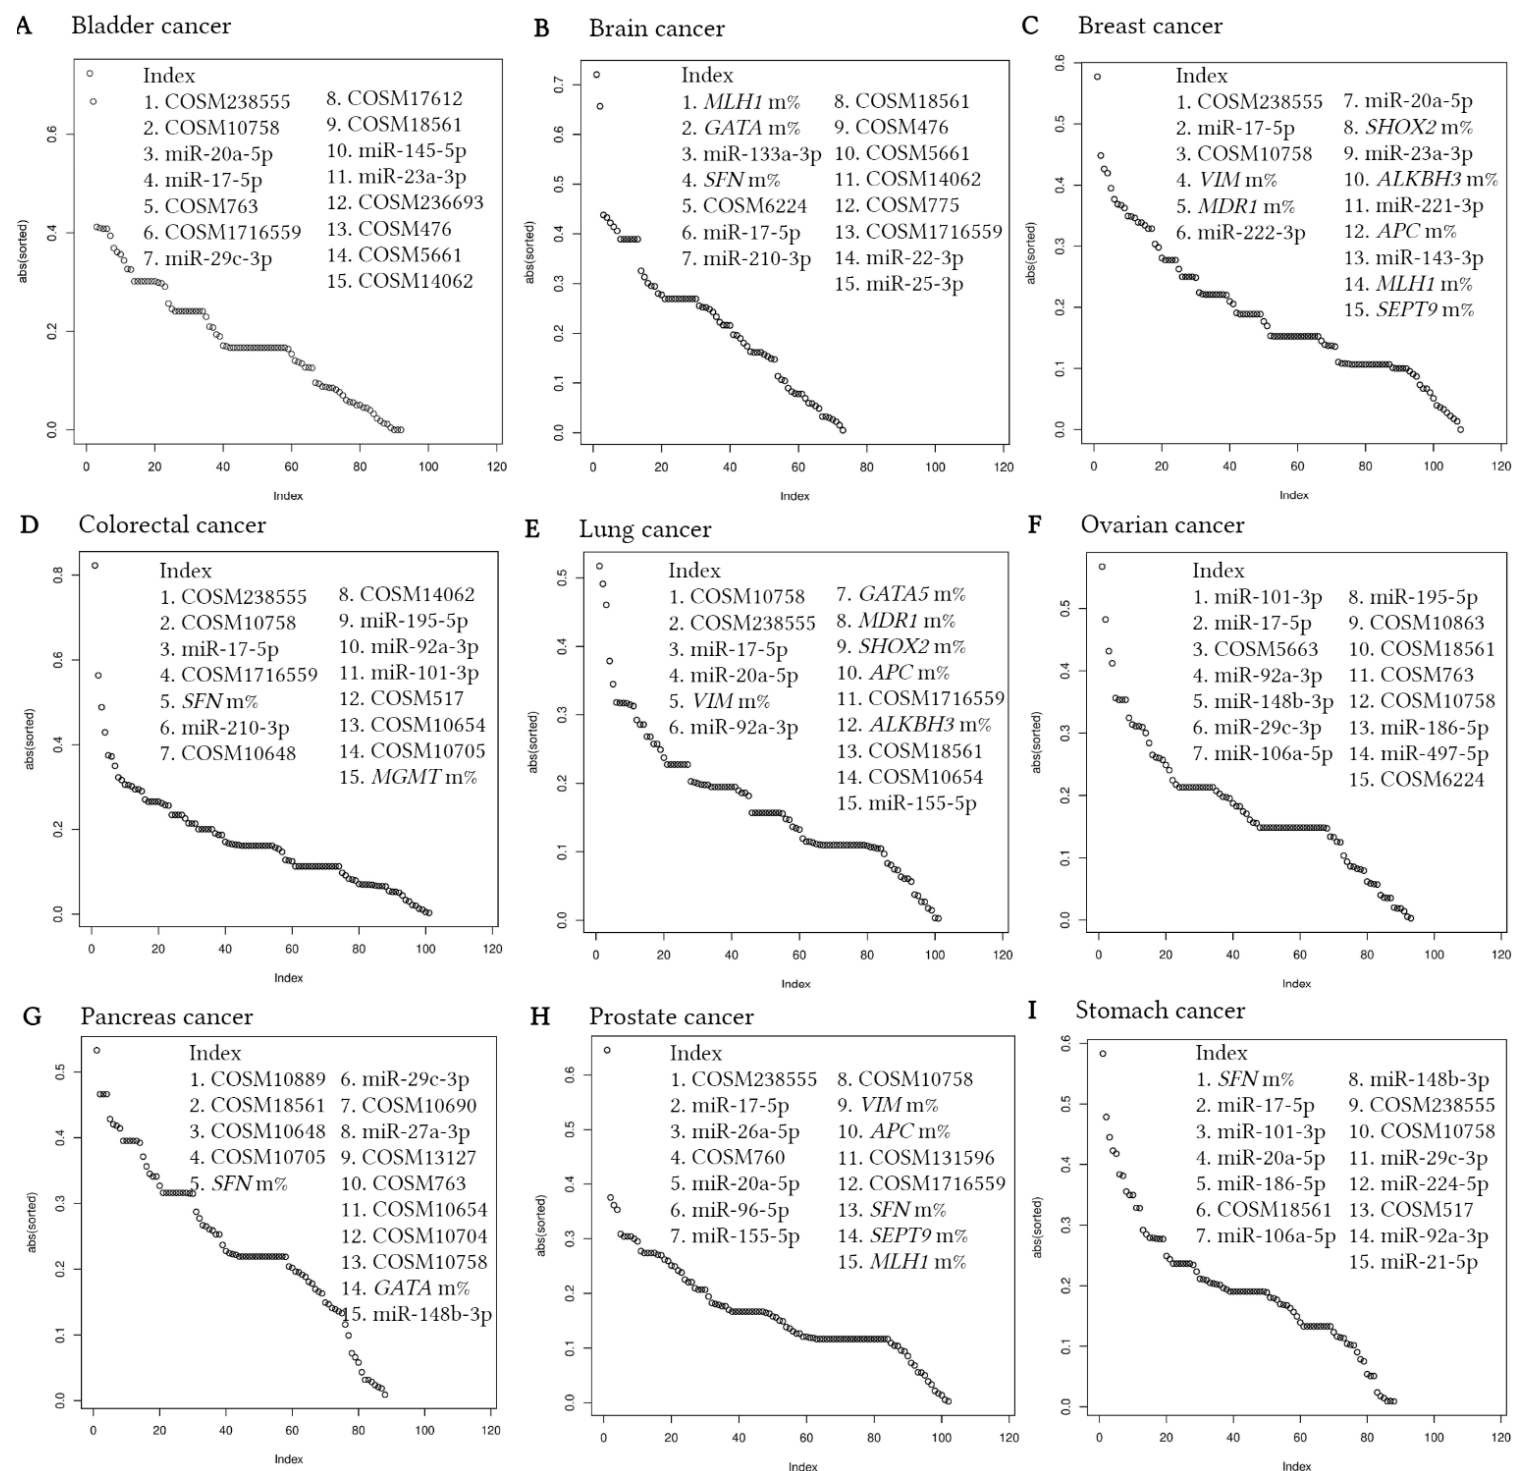

**Supplementary Figure S2.** Correlation plots for each cancer type.

The correlation coefficient of each biomarker is plotted on the y axis. An index value is assigned to each biomarker according to the value of its correlation coefficient (ranked from highest to lowest value) and plotted on the x axis. The 15 biomarkers with the highest correlation coefficients are displayed in the legends of the plots for each cancer type **A-I**

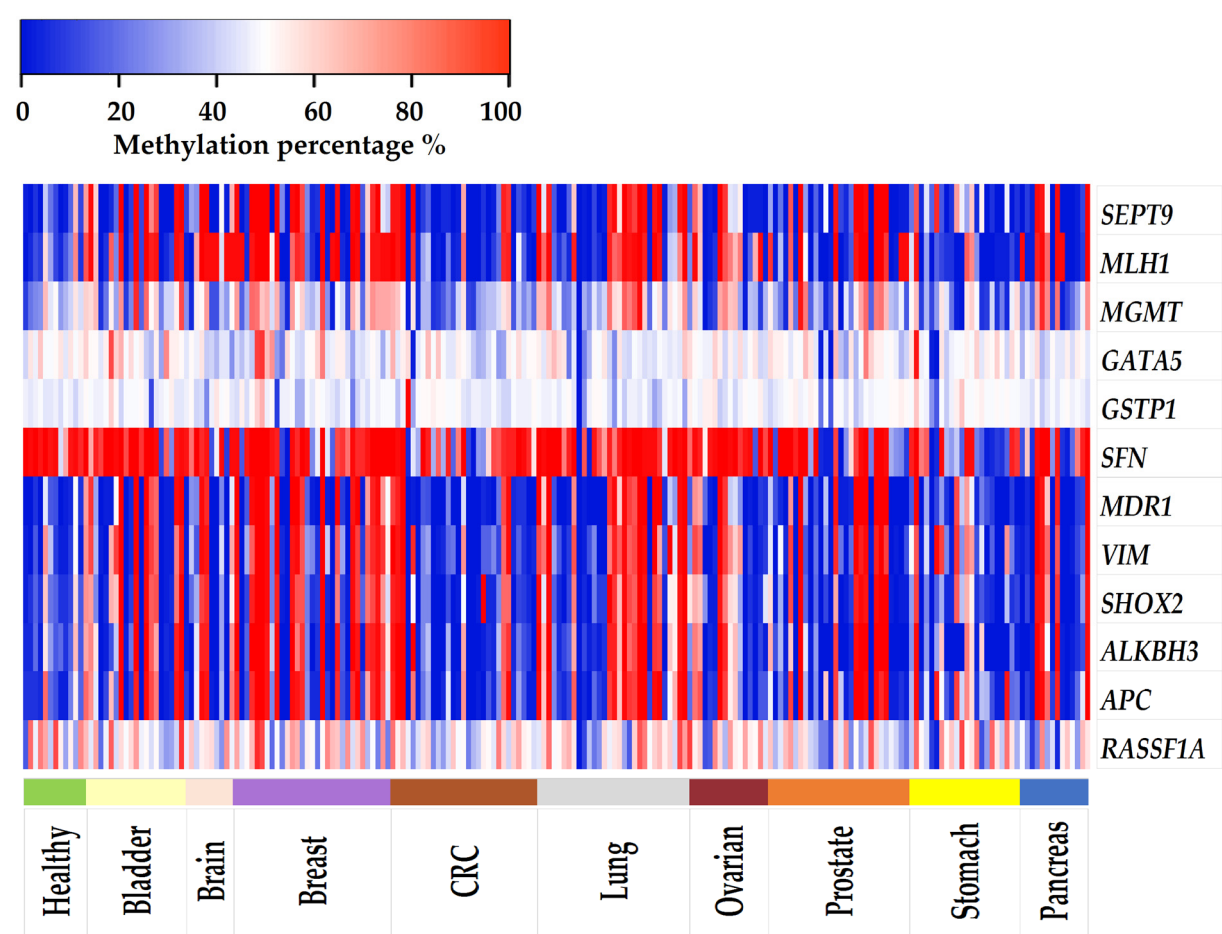

**Supplementary Figure S3.** Heatmap of the cell-free DNA methylation. Columns represent the samples clustered by group, the rows represent the cell-free DNA methylation levels in red (high methylation) and in blue (low methylation).

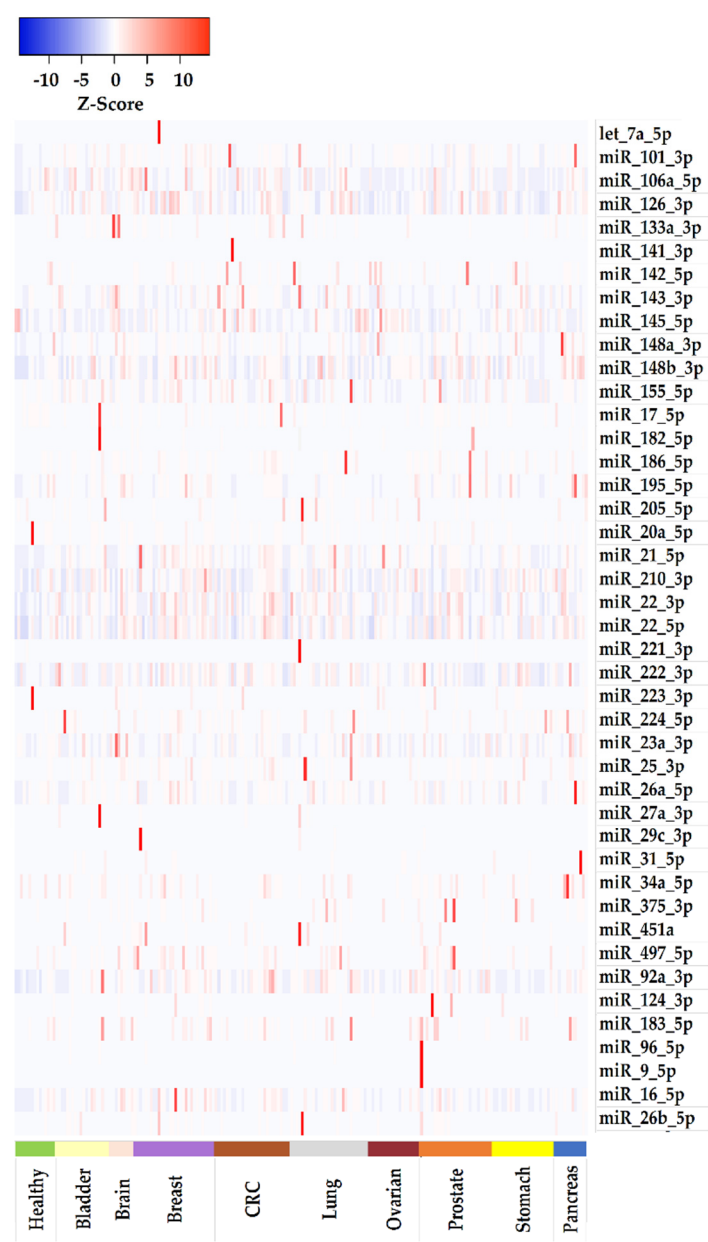

**Supplementary Figure S4.** Heatmap of the miRNAs levels.  
Columns represent the samples clustered by group, the rows represent the miRNAs in red (up-regulated) and in blue (down-regulated).
